# Supplementary material
Source: Springer Nature journal article supplement (https://www.springermedizin.de/resource/supplementary/12903_2014_376_MOESM4_ESM.pdf/9516866)
Supplement: MOESM4 [file 9516866]

Articles retrieved by search strategy (n = 653)

Duplicates removed (n = 417)

Articles selected based on title (n = 236)

Reason for exclusion:

- Did not use CPQ, C-OIDP, COHIP (n = 110)

Articles selected based abstract (n = 126)

Reason for exclusion:

- Did not use CPQ, C-OIDP, COHIP (n = 4)
- Full text not in English (n = 2)

Articles included in analysis (n = 120)\*

- CPQ<sub>8-10</sub> (n = 14)
- CPQ<sub>11-14</sub> (n = 55)
- CPQ short forms (n = 19)
- C-OIDP (n = 33)
- COHIP (n = 11)
- COHIP short form (n=1)
